# Supplementary material
Source: PubMed Central journal article supplement (PMC3067407)
Supplement: supp_10_2_237__1.pdf [file supp_10_2_237__1.pdf]

1 Supplemental Material

2  
3 **FIGURE LEGENDS**

4  
5  
6 **Sup. Fig. 1 The effect of ROS/RNS-generating compounds on the**  
7 **expression levels of *Pbnd6* during the exponential growth phase**  
8 **of *P. brasiliensis* yeast cells.** Cell cultures and ROS/RNS-  
9 generating compound challenges were performed as described in  
10 the materials and methods section. The number of *Pbnd6*  
11 transcripts was determined and normalized as previously  
12 described. The concentrations of the compounds in each addition  
13 were as follows: H<sub>2</sub>O<sub>2</sub> (30 mM), menadione (0.5 mM), SNP (1 mM),  
14 rotenone (2 μM), and KCN (1 mM). The values represent the  
15 expression levels in comparison to the control, and they are  
16 shown as the averages ± SEMs of three independent assays.  
17 Asterisks indicate  $p < 0.05$ . The statistical analyses are  
18 described in the materials and methods section.

19  
20 **Sup. Fig. 2 Nucleotide sequence of the *Pbaox* gene, its deduced**  
21 **amino acids sequence, and conserved regions of catalytic**  
22 **domains.** Nucleotides are shown in small letters and amino acids  
23 in capital letters. The regularly formatted numbers represent  
24 nucleotide positions, and italicized numbers represent amino

1 acid positions. The intron region is underlined with a single  
2 line, and the two transmembrane domains are underlined with  
3 double lines. The start and stop codons are shown in bold. The  
4 predicted amino acids that are responsible for metal and  
5 ubiquinone binding are indicated by # and §, respectively.

6

7 **Sup. Fig. 3 Alignment of the four primarily conserved regions**  
8 **among the alternative oxidases.** The numbers 1, 2, 3, and 4  
9 represent the conserved regions of LET, NERMHL, LEEEA, and RADE-  
10 H, respectively. The black boxes indicate the conserved amino  
11 acids among the AOXs from *P. brasiliensis* (accession number  
12 EEH19342.1), *H. capsulatum* (accession number AF133236), *C.*  
13 *albicans* (accession number AF116872), and *T. brucei brucei*  
14 (accession number TBU52964). The two transmembrane domains are  
15 underlined with double lines. The predicted amino acids that are  
16 responsible for metal and ubiquinone binding are indicated by #  
17 and §, respectively.

18

19 **Sup. Fig. 4 The heterologous expression of *Pbaox* compromises the**  
20 **growth of *S. cerevisiae*.** The growth of *S. cerevisiae*/pYES-*Pbaox*  
21 and *S. cerevisiae*/pYES was monitored by measuring the optical  
22 density of the cell cultures at 600 nm over 72 h in liquid  
23 media. A, fermentable medium (glucose as carbon source). B, non-

1 fermentable medium (glycerol and ethanol as carbon sources). The  
2 graphs are representative of at least three independent assays.

3

4

5

6

7

8

9

10

11

12

13

14

15

16

17

18

19

20

21

22

23

24

1  
2  
3  
4

Supplemental Figure 1

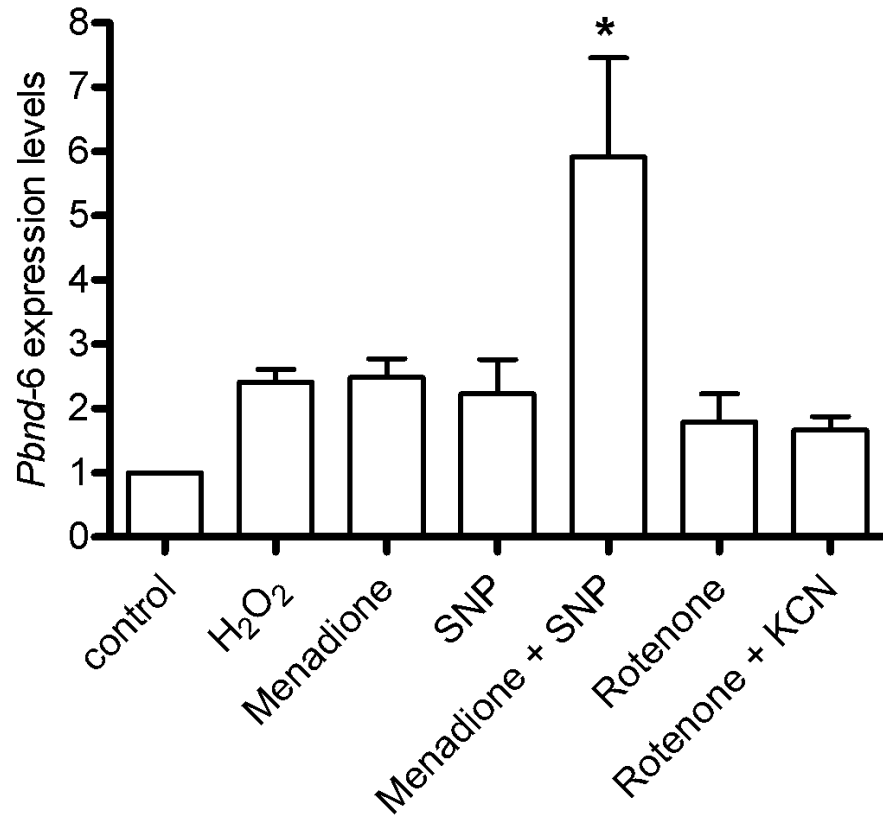

5  
6  
7  
8  
9  
10  
11  
12

## Supplemental Figure 2

-138 cactctatcccttctttggaagctgaaaaagataataataagctggttacctaccatataca -79  
 -78 caatatcacctgtcttcatcaagaatttggcctgaatcaaagccttttgagaaacgtagt -19  
 -18 ttcacccctctgctcgccatgatccgatctccgcaggacccatgagaacctttgttctc 42  
 1 M Y P I S A G P M R T F V L 14  
 43 tcccgcctctgcctcgtccatactgcgtggctcattcgggtcaatcaactgctctttccaga 102  
 15 S R S A S S I L R G S F G Q S T A L S R 34  
 103 ggtctccagtgtagtagtctctgctttactataacattgcccttgggagcaagagggtgc 162  
 35 G L Q C S S P L L Y Y N I A L G S K R C 54  
 163 ttctcagcaggccccgccaacgagccaaagaatatttcccagccctcagtggaaacaaaa 222  
 55 F S A G P R Q R A K E Y F P A L S G T K 74  
 223 catattgtcagagtctgaaacaacatgggcacatccaatgtgtgctgttgggtcacacac 282  
 75 H I V E S E T T W A H P M F 88  
 283 aaccgtgctctgcccccgttttgtctgagatataatctaaccataaaaccaattgtagtca 342  
 T 89  
 343 ccgaagagcagatgaagagtattgtcatcgcacatcgaaatgctgagacctgggtccgatt 402  
 90 E E Q M K S I V I A H R N A E T W S D W 109  
 403 gggttgccttgggaaccggttcgtatggtgctgggctacagatctggcaacagggttaca 462  
 110 V A L G T V R M L R W A T D L A T G Y K 129  
 463 aacatcccgggaagtcggaccagaatgagcaatgttattgactgagaagaaatggatca 522  
 130 H P G K S D Q N E Q F V M T E K K W I I 149  
 523 tccggttcatttttctagaaaccggttgctgggtgccttgggaatgggtggaggtatgctcc 582  
 150 R F I F L E<sup>#</sup> T V A G V P G M V G G M L R 169  
 583 gccatctccgaagcctaagacgaatgaagcgggataatggatggatcgaaactcttttag 642  
 170 H L R S L R R M K R D N G W I E T L L E 189  
 643 aagaagcatacaacgagagaatgcacctgctgtcattcctgaaactcgtaaaaccagggt 702  
 190 E A Y N E<sup>#</sup> R M H<sup>#</sup> L L S F L K L A K P G W 209  
 703 ggtttatgctgctcatggttttaggagcccagggtgtcttcttcaactctttcttcatgg 762  
 210 F M R L M V L G A Q G V F F N S F F M A 229  
 763 catacctcatctcccccgacctgccaccgcttcgctcgggtacctcgaagaggaggctg 822  
 230 Y<sup>s</sup> L I S P R T C H R F V G Y L E<sup>#</sup> E E A V 249  
 823 ttatgacgtacacacacgcaattaacgacctcgaagctgggaagttgcctgagtgggcca 882  
 250 M T Y<sup>s</sup> T H A I N D L E A G K L P E W A N 269  
 883 acaaagaggctccagatattgccgtggcttactggcacatgccagaaaaacaagagaacca 942  
 270 K E A P D I A V A Y W H M P E N K R T I 289  
 943 ttctggacttgctgtactatatccgtgccgatgaagctaagcattgtgaggtcaaccaca 1002  
 290 L D L L Y Y I R A D E<sup>#</sup> A K H<sup>#</sup> C E V N H T 309  
 1003 ccctggccaacttgaagcccaacgctcgatccaaatccttatacctcgaagtacgataacc 1062  
 310 L A N L K P N V D P N P Y T S K Y D N P 329  
 1063 ccgatgtgcctcatccaacgaagacagccgagataatcaaaccactggctgggaaagaa 1122  
 330 D V P H P T K T A E I I K P T G W E R K 349  
 1123 aggatgtcatctaaatggacaaggaaccctttcaaatgctgaattaacgtcaacctctt 1182  
 350 D V I \* 352  
 1183 atcaatccttcgacatattttcgccagggtggggttaccaagcactgacctttcttctgct 1242  
 1243 ttgtgatttcggttgcgagccttgaagaagacaccactctgataccccgcttccatatac 1302  
 1303 ctttccactcaaaattacatacaaaaaaacagactaaatcataaaaatgcataattggcg 1362  
 1363 ggggtggttgggcatagcggatggcgttgttttcttttgcctttgttgcctct 1422  
 1423 cctgttgtgcttgcgatagtcagttaaacggagttctaatttatttaccatccgcattct 1482  
 1483 ttaatttcactttttccgctccgctcatttgttttaagtttgttctgcttgaatccggt 1542  
 1543 tgtctgtttaattgacattcgtgggatgggaaccattatgcggaacatggttgcgttca 1602  
 1603 agtgactttgttttagaagagaatgaagtttgtttcaaagcattccaagaggagtaa 1662  
 1663 taatctaattgtccaaccaa 1681

Supplemental Figure 3

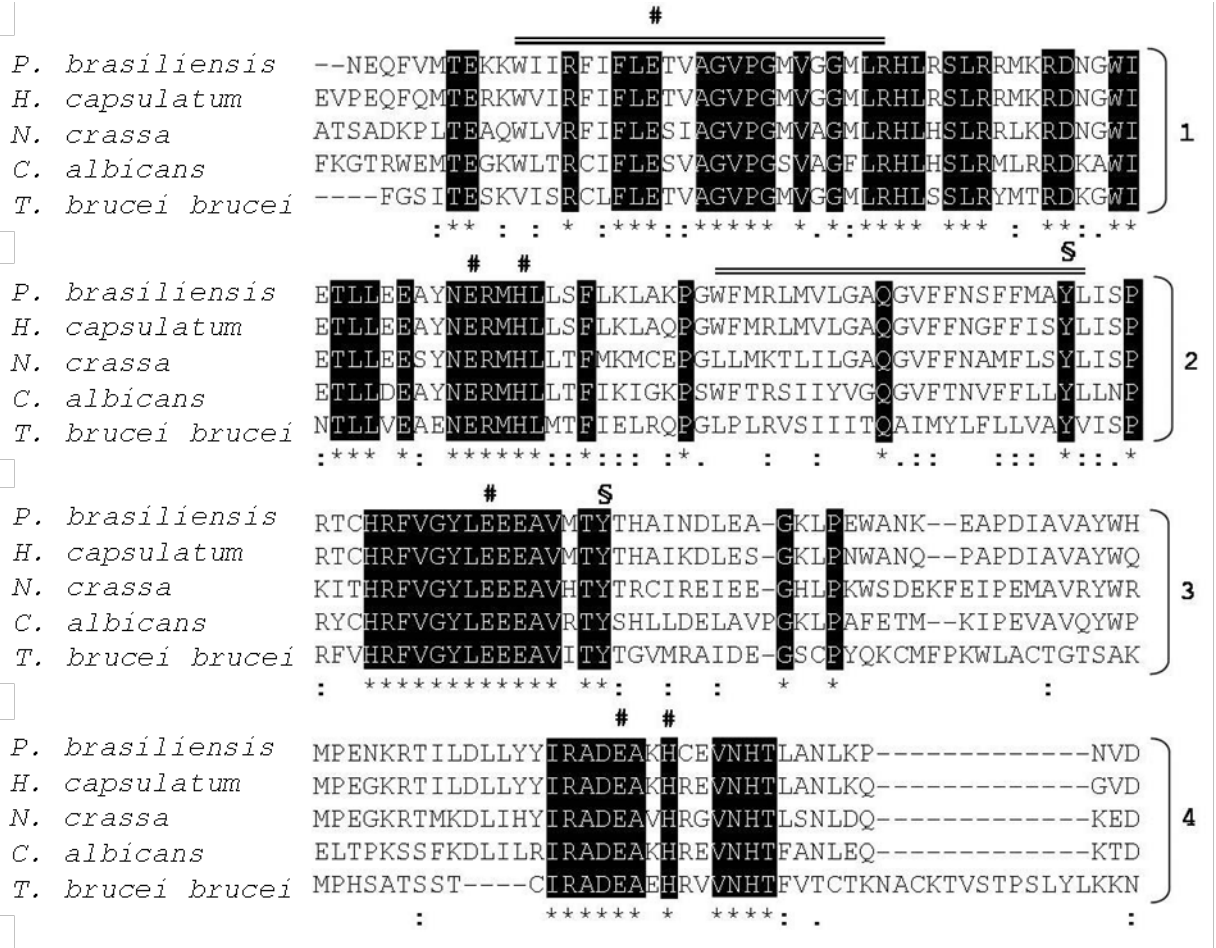

1  
2

### Supplemental Figure 4

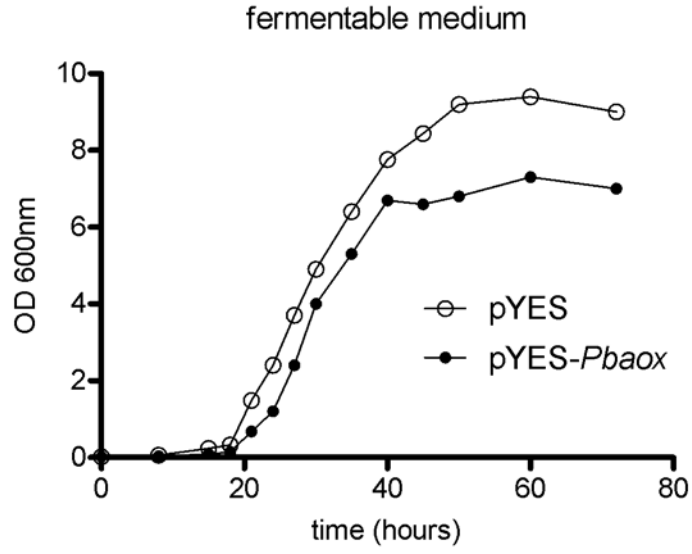

3

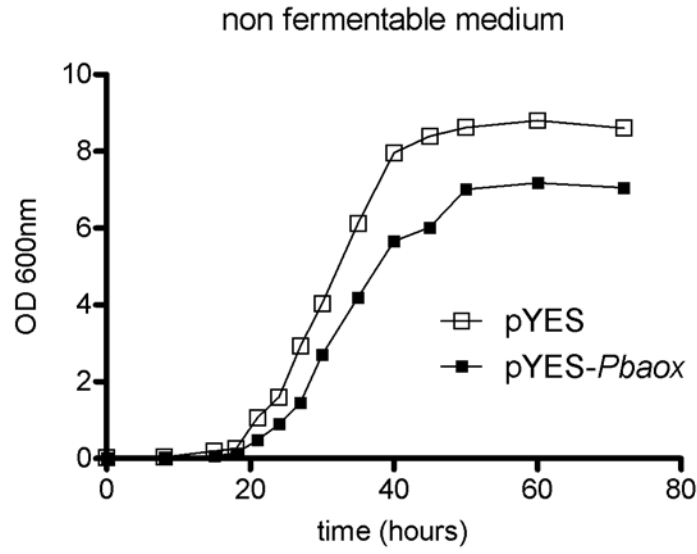

4  
5
